# Supplementary material for: Chinese chestnut shell polyphenol extract regulates the JAK2/STAT3 pathway to alleviate high-fat diet-induced, leptin-resistant obesity in mice
Source: Royal Society of Chemistry journal article supplement (doi:10.1039/d3fo00604b), 2023-01-01
Supplement: d3fo00604b1.pdf [file d3fo00604b1.pdf]

## Supplement table

Table 1 Major components of chestnut *Castanea mollissima* shell polyphenol extract (CSP)

| Component                              | Content (mg/g) |
|----------------------------------------|----------------|
| Vanillic acid                          | 0.26±0.01      |
| Myricetin                              | 0.77±0.02      |
| Androgenic acid                        | 0.27±0.01      |
| Quercetin                              | 1.64±0.05      |
| Trans-4-hydroxy-3-methoxycinnamic acid | 0.08±0.00      |
| Trans-p-coumaric acid                  | 0.09±0.00      |
| 3,4-dihydroxybenzoic acid              | 5.54±0.15      |
| Gallic acid                            | 11.20±0.79     |
| Ellagic acid                           | 1.15±0.03      |
| Procyanidin C1                         | 126.00±2.72    |
| Procyanidin B1                         | 148.00±2.57    |
| Procyanidin B2                         | 18.70±0.83     |
| (+)-Catechin                           | 46.90±1.12     |
| (-)-Epicatechin                        | 2.07±0.09      |
| Quercetin 3-glucoside                  | 0.32±0.01      |
| (-)-Epicatechin gallate                | 1.73±0.06      |
| (-)-Epigallocatechin gallate           | 0.09±0.00      |
| Total                                  | 364.81±3.58    |

Values are expressed as the mean ± standard deviation, n = 3.

18

## Supplement figure

19

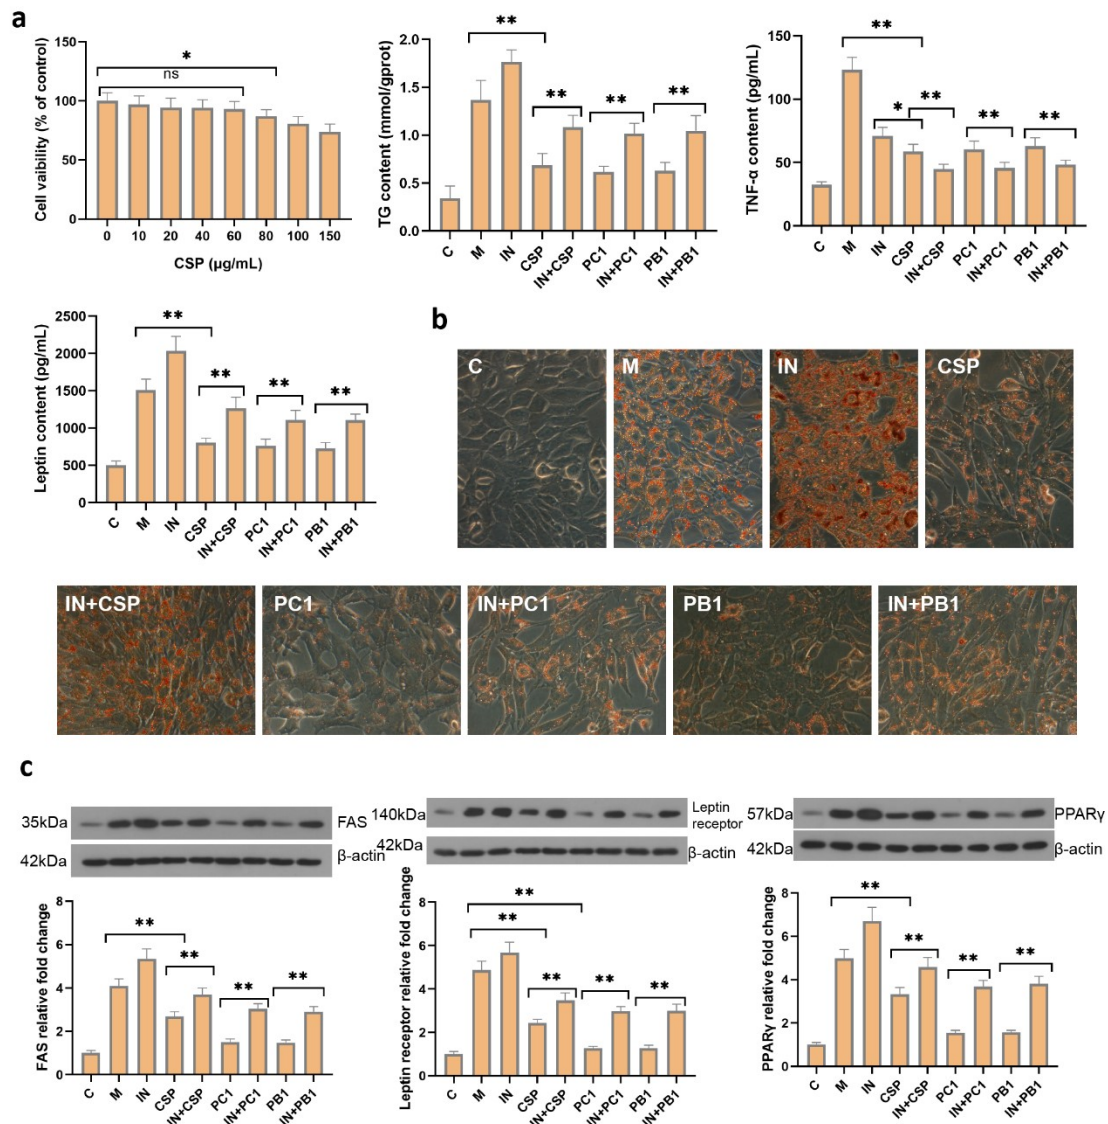

20

21 Figure S1. CSP, monomer components PC1 and PB1 reduce fat accumulation in 3T3-L1 cells

22 3T3-L1 cells were cultured with DMEM containing high sugar at 37 °C and 5% CO<sub>2</sub> to achieve

23 cell fusion. Next, 48 h after fusion (day 0), Inducer 1 (high glucose DMEM complete medium

24 containing 0.5 mmol/L IBMX + 1 μmol/L dexamethasone + 1 μg /mL insulin + 10% FBS + 100

25 U/mL penicillin + 100 μg/mL streptomycin, Aladdin, China) was cultured for 48 h.

26 Inducer 2 (DMEM complete medium with high glucose containing 1 μg/mL insulin) was cultured

27 for 48 h. The medium was changed every two days until 9–11 days. After 48 h of fusion, cells were

28 induced to differentiate. Inducer 1 was added to culture for 48 h, and inducer 2 was changed with

29 or without CSP (60 μg/mL)/JAK2 inhibitor AG490 (50 μmol/L) (A126525, Aladdin, China) for 48

30 h. The media was then changed to normal medium with or without CSP (60 µg/mL)/monomer drug  
31 (procyanidin C1/procyanidin B1, 20 µM, Shyuanye, Shanghai, China). The grouping and treatment  
32 methods are as follows:

33 C, control group (normal culture). M, model group (Inducer 1 cultivation 48 h + Inducer 2  
34 cultivation 48 h + ordinary medium; IN, Model + inhibitor group (culture with inducer 1 for 48 h+  
35 culture with inducer 2 containing AG490 for 48 h + culture with ordinary medium). CSP, Model +  
36 CSP group (culture with inducer 1 for 48 h + culture with inducer 2 containing CSP for 48 h +  
37 culture with common medium containing CSP). IN+CSP, Model + inhibitor group + CSP group  
38 (culture with inducer 1 for 48 h+ culture with inducer 2 containing AG490 and CSP for 48 h+ culture  
39 with common medium containing CSP). PC1 and IN+PC1 · Model + procyanidin C1 group, model  
40 + procyanidin C1 group and group 4 had the same conditions except with polyphenols. PB1-IN+PB1,  
41 Model + inhibitor + procyanidin B1 group and model + inhibitor + procyanidin B1 group had the  
42 same conditions as group 4, except with polyphenols. \*\*p < 0.01, \*p < 0.05.

43

44
